# Supplementary material for: Optimization of indirect wastewater characterization: a hybrid approach based on decision trees, genetic algorithms and spectroscopy
Source: Royal Society of Chemistry journal article supplement (doi:10.1039/d3ew00410d), 2023-01-01
Supplement: d3ew00410d1.pdf [file d3ew00410d1.pdf]

*Supplementary Materials*

**Optimization of indirect wastewater characterization: A hybrid approach based on  
decision trees, genetic algorithms and spectroscopy**

Daniel Carreres-Prieto<sup>1\*</sup>, Juan T. García<sup>2\*</sup>, \*, José M. Carrillo<sup>2</sup> and Antonio Viguera-Rodríguez<sup>2</sup>

1. Center for Technological Innovation in Construction and Civil Engineering (CITEEC),  
Universidade da Coruña, 15008, A Coruña, Spain
2. Department of Mining and Civil Engineering, Universidad Politécnica de Cartagena,  
30202 Cartagena, Spain

\* Correspondence: [daniel.carreres@udc.es](mailto:daniel.carreres@udc.es) (D.C.-P.); [juan.gbermejo@upct.es](mailto:juan.gbermejo@upct.es) (J.T.G.)

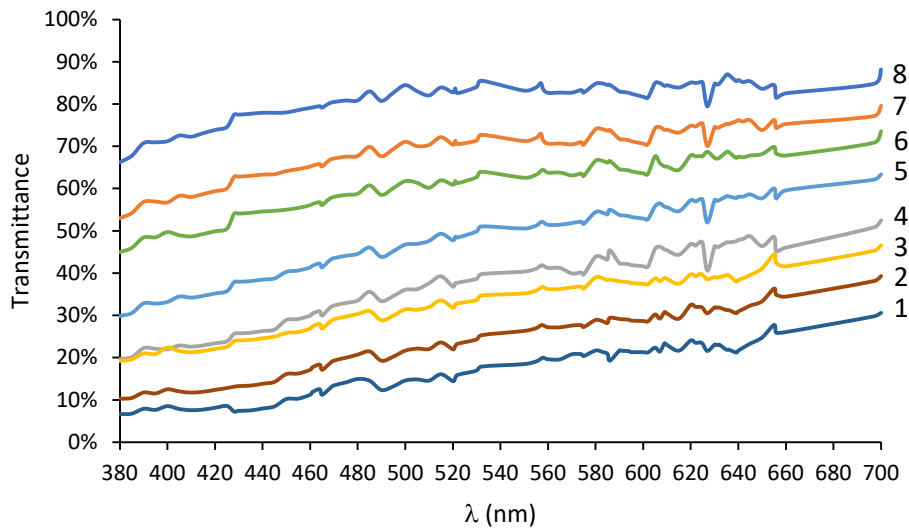

| Polluting parameters       | Samples |      |      |      |      |      |      |      |
|----------------------------|---------|------|------|------|------|------|------|------|
|                            | 1       | 2    | 3    | 4    | 5    | 6    | 7    | 8    |
| COD (mg/l)                 | 1842    | 1574 | 849  | 981  | 672  | 394  | 252  | 11   |
| BOD <sub>5</sub> (mg/l)    | 150     | 340  | 540  | 660  | 400  | 280  | 215  | 4.3  |
| TSS (mg/l)                 | 1032    | 844  | 320  | 286  | 368  | 196  | 73   | 2.8  |
| Phosphorus (P) (mg/l)      | 12.5    | 11.8 | 10.5 | 10.5 | 5.84 | 2.8  | 3.11 | 8.19 |
| Total Nitrogen (TN) (mg/l) | 86      | 86   | 86   | 96.3 | 42.9 | 41   | 31   | 15.9 |
| NO <sub>3</sub> -N (mg/l)  | 0.8     | 0.7  | 0.7  | 0    | 0    | 0.3  | 0    | 9.8  |
| PH                         | 7.6     | 7.38 | 7.6  | 7.96 | 7.95 | 7.73 | 8.17 | 7.61 |
| Conductivity (μS/cm)       | 2500    | 2480 | 2400 | 1746 | 965  | 2200 | 979  | 878  |

**Figure S1.** Spectral response of eighth samples taken at random, accompanied by their laboratory characterization, relating to both raw wastewater samples and treated wastewater.

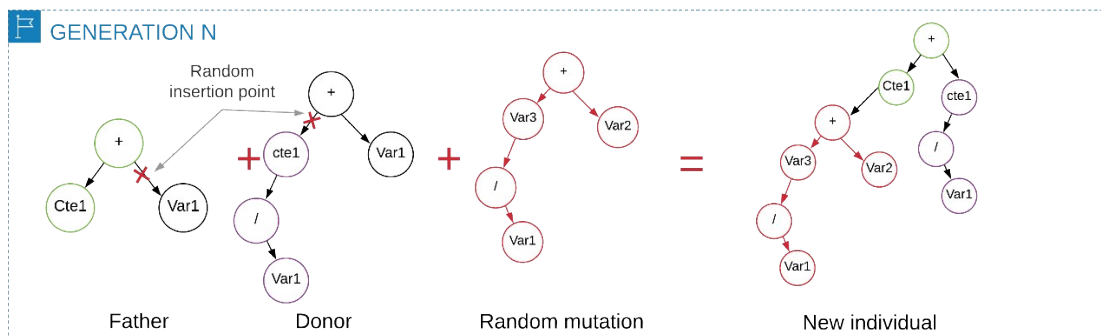

**Figure S2.** Simplified diagram of model generation based on genetic algorithms.

**S1. Specific estimation models for raw wastewater**

**S1.2. Biochemical Oxygen Demand estimation models (BOD<sub>5</sub>)**

### ***S.1.2.1. GA model based on global trend line***

Equation (S1) shows the model for estimating BOD<sub>5</sub> from the overall trend line of the spectral response, calculated from 328 raw water samples, after removing outliers. The model presents a Pearson's coefficient of 66.36% for training and 51.47% for testing, reaching the optimum at generation 17 of 25, with a mutation rate of 20%.

$$BOD_{5(mg/l)} = \left( \frac{c_0}{c_1 * M_{Global} + c_2 * N_{Global}} - ((c_3 * N_{Global})^2 - (c_4 * N_{Global} - c_5)) \right) + c_6$$

$$c_0 = 655,06, c_1 = -149.35, c_2 = -7.519, c_3 = -5,434.49, c_4 = -2,921.78, \quad (S1)$$

$$c_5 = -1446,39, c_6 = 1.5566$$

### ***S.1.2.2. GA model based on multiple individual trend lines for each colour group***

Similar estimation results are achieved with the model of Equation (S2), relative to the trend lines of the different colour groups of the visible spectrum, with a Pearson's coefficient of 67.86% for training and 54.17% for testing, achieving the optimum in generation 16 of 25 and a mutation rate of 20%.

$$BOD_{5(mg/l)} = \frac{((c_0 * M_{Cyan} - c_1 * N_{Violet}) - (c_2 * N_{Blue} + c_3 * N_{Orange}))}{((c_4 * N_{Cyan} + c_5 * M_{Yellow}) - (c_6 + c_7 * M_{Violet}))} + c_8$$

$$c_0 = 3,120,040.98, c_1 = 196,000.47, c_2 = -35,647.17, c_3 = 7,614.70, \quad (S2)$$

$$c_4 = 92.42, c_5 = 41.46, c_6 = -5.10, c_7 = 1759.30, c_8 = 1753.2'$$

### ***S.1.2.3. GA model based on point values of the spectral response***

Equation (S3) shows the model for estimating BOD<sub>5</sub> from point values of the spectral response, achieving a Pearson's Coefficient of 70.77% for training and 53.02% for test.

$$BOD_{5(mg/l)} = \left( \frac{c_0 * A_{627} + c_1 * T_{627}}{c_2 * T_{450} - c_3 * T_{425}} - \left( \frac{c_4}{A_{627}} + (c_5 * T_{420} + c_6 * A_{627}) \right) \right) + c_7$$

$$c_0 = -942.30, c_1 = 1,384.47, c_2 = -24.04, c_3 = -35.44, c_4 = -15.34, \quad (S3)$$

$$c_5 = 593.14, c_6 = -1,347.66, c_7 = 8.20$$

### ***S.1.2.4. Hybrid characterization model based on decision trees***

Figure S3 shows the classification tree for the hybrid model of combined water characterization for BOD<sub>5</sub>, with a R<sup>2</sup> of 61.05% for training and 67.86% for test.

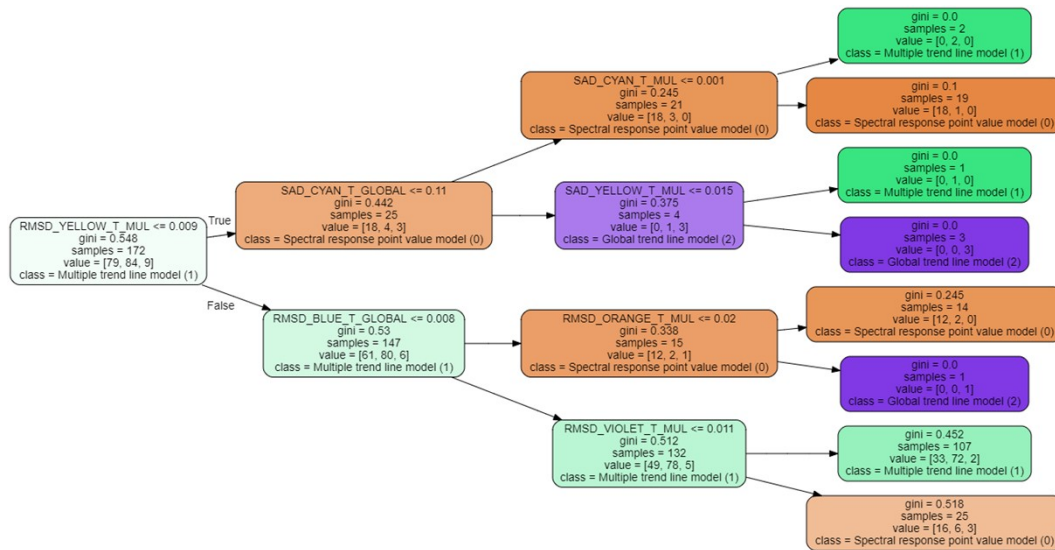

**Figure S3.** Classification tree for hybrid model of raw wastewater characterization for BOD<sub>5</sub>.

Figure S4 shows the scatter plot of the estimation models based on trend lines (Equation (S1 and S2)), as well as the hybrid model of Figure S5. As can be seen, the scatter plot in Figure S4 C shows a lower dispersion of the data, which denotes an improvement in the ability to characterize the sample with respect to the exclusive use of other techniques.

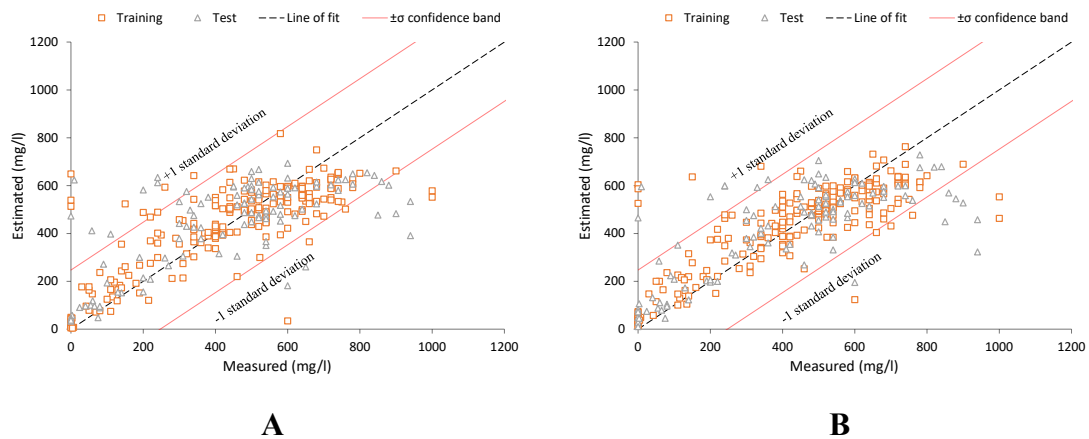

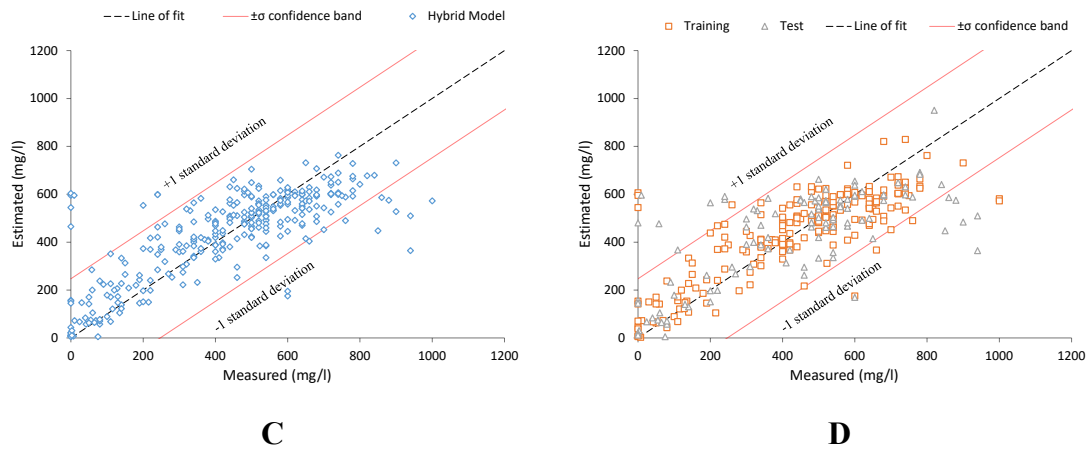

**Figure S4.** Scatter plot between laboratory measured BOD<sub>5</sub> values (Measured) and those estimated by: (A) Global Model, Equation (S1). (B) Individual trend model, Equation (S2). (C) Hybrid model. (D) Model based on spectral point values by Offspring Selection technique, Equation (S3).

### S1.3. Total Suspended Solids estimation models (TSS)

#### S.1.3.1. GA model based on global trend line

Equation (S4) shows the model for estimating the TSS from the global trend line, with a Pearson's coefficient of 61.90% for training and 70.37% for testing, from 294 samples after removing outliers.

$$TSS_{(mg/l)} = \left( \left( (c_0 * N_{Global} + c_1) - (c_2 * N_{Global}) \right)^2 - \frac{(c_3 * N_{Global})^2}{c_4 * N_{Global} + c_5 * M_{Global}} \right) + c_6 \quad (S4)$$

$$c_0 = 1099.27; c_1 = 450.29; c_2 = -3,369.09; c_3 = -8,385.07; c_4 = -3.0189;$$

$$c_5 = -110.05; c_6 = 3.4933$$

#### S.1.3.2. GA model based on multiple individual trend lines for each colour group

Similar estimation levels are achieved with the model of Equation (S5), to estimate TSS from the trend line of the different colour groups, with a Pearson's coefficient of 67.42% and 71.95% for training and test, respectively.

$$TSS_{(mg/l)} = \frac{\left( (c_0 * N_{Blue} - c_1 * N_{Orange}) - (c_2 * N_{Green} + c_3) \right)}{(c_4 * N_{Green} + c_5) + (c_6 * N_{Green})^2} + c_7 \quad (S5)$$

$$c_0 = 132,974.44; c_1 = -44,412.66; c_2 = -379,809.60; c_3 = -70,644.03;$$

$$c_4 = 555.67; c_5 = 81.545; c_6 = -26.872; c_7 = -441.9$$

### S.1.3.3. GA model based on point values of the spectral response

Equation (S6), shows the model for estimating TSS from point values of the spectral response, achieving a Pearson's Coefficient of 70.39% for training and 74.09% for test.

$$TSS_{(mg/l)} = \left( \frac{c_0 * T_{521} + c_1 * T_{630} + c_2 * T_{500} + c_3 * T_{642}}{(c_4 * T_{521} + c_6 * T_{630}) - (c_6 - c_7 * A_{574})} \right) + c_8$$

$$c_0 = 160,880.01, c_1 = -714,652.13, c_2 = 171,926.03, c_3 = 424,116.73,$$

$$c_4 = -237.47, c_5 = -519.34, c_6 = -561.32, c_7 = -864.11, c_8 = 275.01$$
(S6)

### S.1.3.4. Hybrid characterization model based on decision trees

Figure S5 shows the classification tree for the hybrid model of combined water characterization for TSS, with an  $R^2$  for training of 59% and 72% for test, respectively.

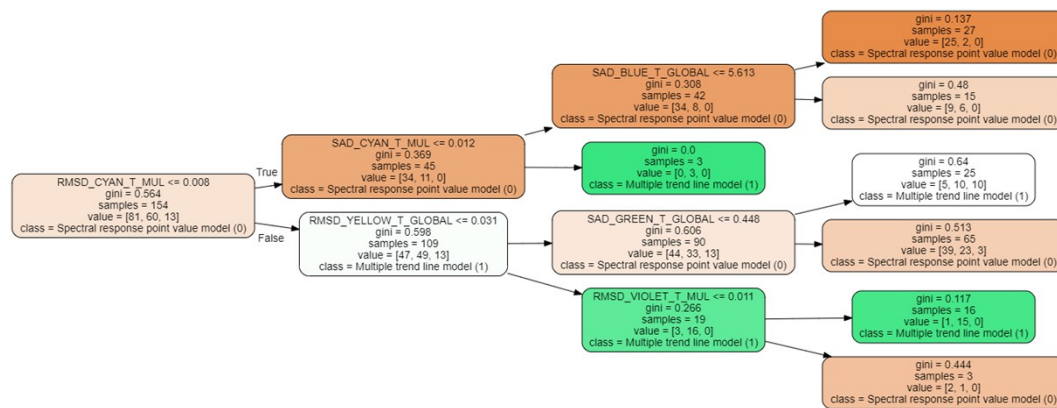

**Figure S5.** Classification tree for hybrid model of raw wastewater characterization for TSS.

Figure S6 shows the scatter plot for each of the calculated models.

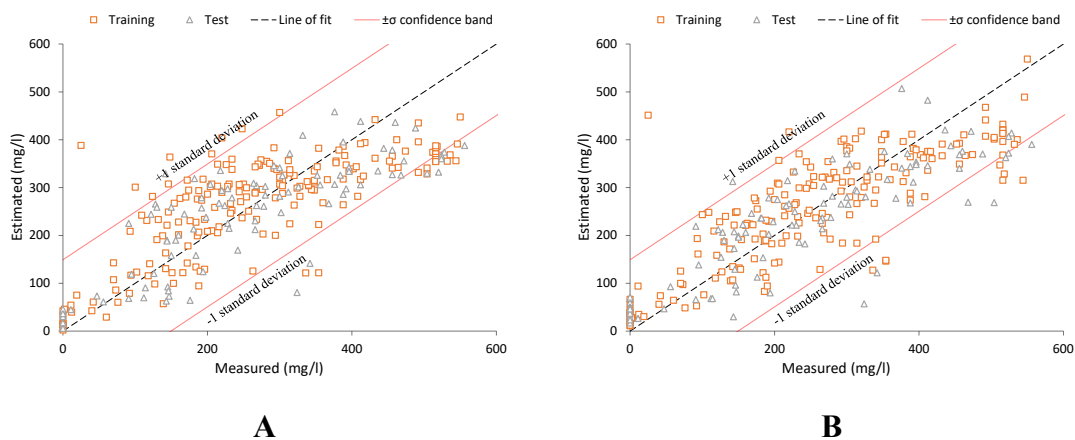

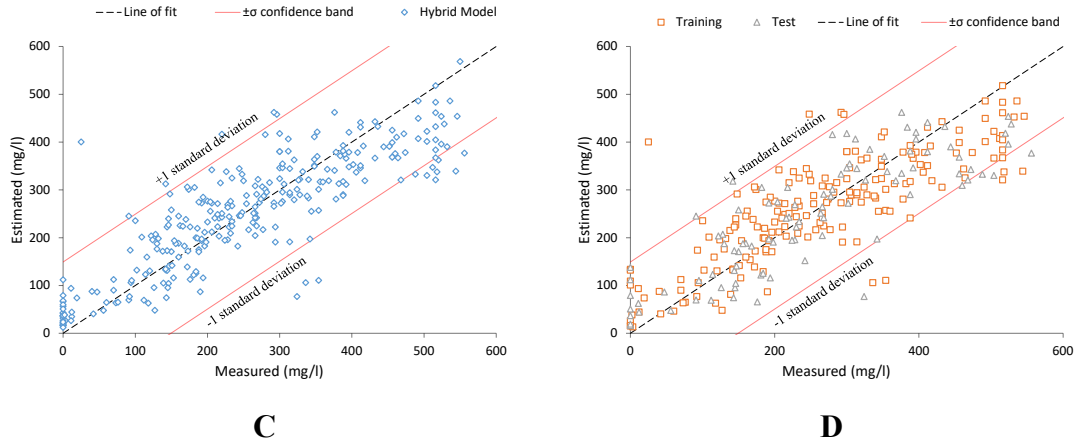

**Figure S6.** Scatter plot between laboratory measured TSS values (Measured) and those estimated by: (A) Global Model, Equation (S4). (B) Individual trend model, Equation (S5). (C) Hybrid model. (D) Model based on spectral point values by Offspring Selection technique, Equation (S6).

#### ***S1.4. Total Nitrogen estimation models (TN)***

##### ***S.1.4.1. GA model based on global trend line***

Equation (S7) shows the model for estimating TN estimates from the global trend line of the spectral response, calculated from 299 raw water samples, after removing outliers. The model shows a Pearson's coefficient of 60.48% for training and 52.08% for testing.

$$TN_{(mg/l)} = \frac{(c_0 * N_{Global})^2 + \frac{c_1}{N_{Global}}}{(c_3 * N_{Global})^2 - c_4 * M_{Global} * c_5} * c_6 + c_7 \quad (S7)$$

$$c_0 = -12.85, c_1 = 0.60, c_3 = 4.85, c_4 = 58.70, c_5 = -57.80, c_6 = -14.315,$$

$$c_7 = 83.97$$

##### ***S.1.4.2. GA model based on multiple individual trend lines for each colour group***

The model of Equation (S8), to estimate TN from the trend line of the different colour groups, achieves similar estimation levels, with a Pearson's coefficient of 68.12% and 53.86 % for training and test, respectively.

$$TN_{(mg/l)} = \frac{(c_0 * N_{Orange} * M_{Green} + (c_1 * N_{Cyan} + c_2))}{(c_3 * M_{Green} + (c_4 * N_{Orange} - c_5 * N_{Cyan}))} + c_6 \quad (S8)$$

$$c_0 = -1,311,112.59; c_1 = -34,075.30; c_2 = 11,736.60; c_3 = 19,704.98;$$

$$c_4 = 166.7; c_5 = -67.63; c_6 = 86.407$$

### S.1.4.3. GA model based on point values of the spectral response

Equation (S9) shows the model for estimating TN from point values of the spectral response, achieving a Pearson's Coefficient of 67.40% for training and 57.23% for test.

$$TN_{(mg/l)} = \left( \frac{(c_0 * T_{425} + c_1 * T_{468}) - (c_2 * T_{490} + c_3)}{(c_4 * A_{435} + c_5) - (c_6 * T_{558} + c_7 * T_{490})} \right) + c_8 \quad (S9)$$

$$c_0 = 4,918.08; c_1 = 40,612.12; c_2 = 41,828.26; c_3 = 834.67;$$

$$c_4 = 29.39; c_5 = -34.63; c_6 = 132.51; c_7 = -126.01; c_8 = 54.34$$

### S.1.4.4. Hybrid characterization model based on decision trees

Figure S7 shows the classification tree for the hybrid model of combined water characterization for TN, with an R<sup>2</sup> for training of 66.67% and 73.61% for test, respectively.

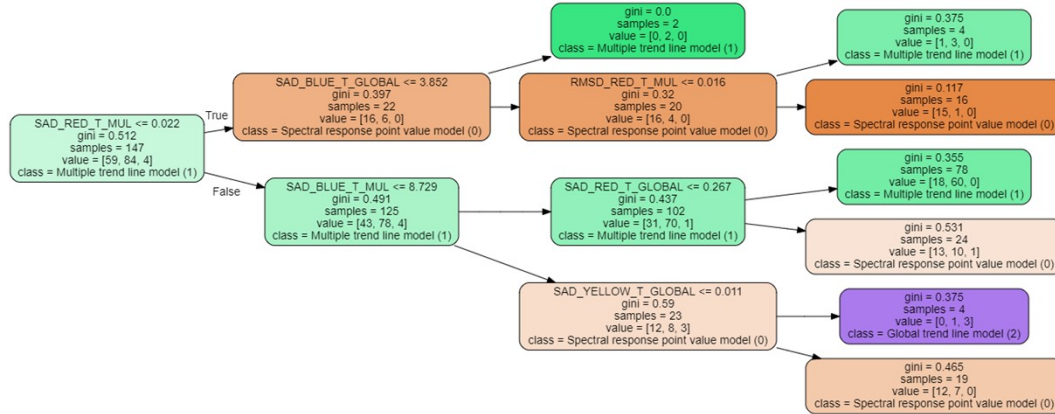

**Figure S7.** Classification tree for hybrid model of raw wastewater characterization for TN.

Figure S8 shows the scatter plot for each of the calculated models, where less dispersion is observed in the hybrid model (Figure S9 C).



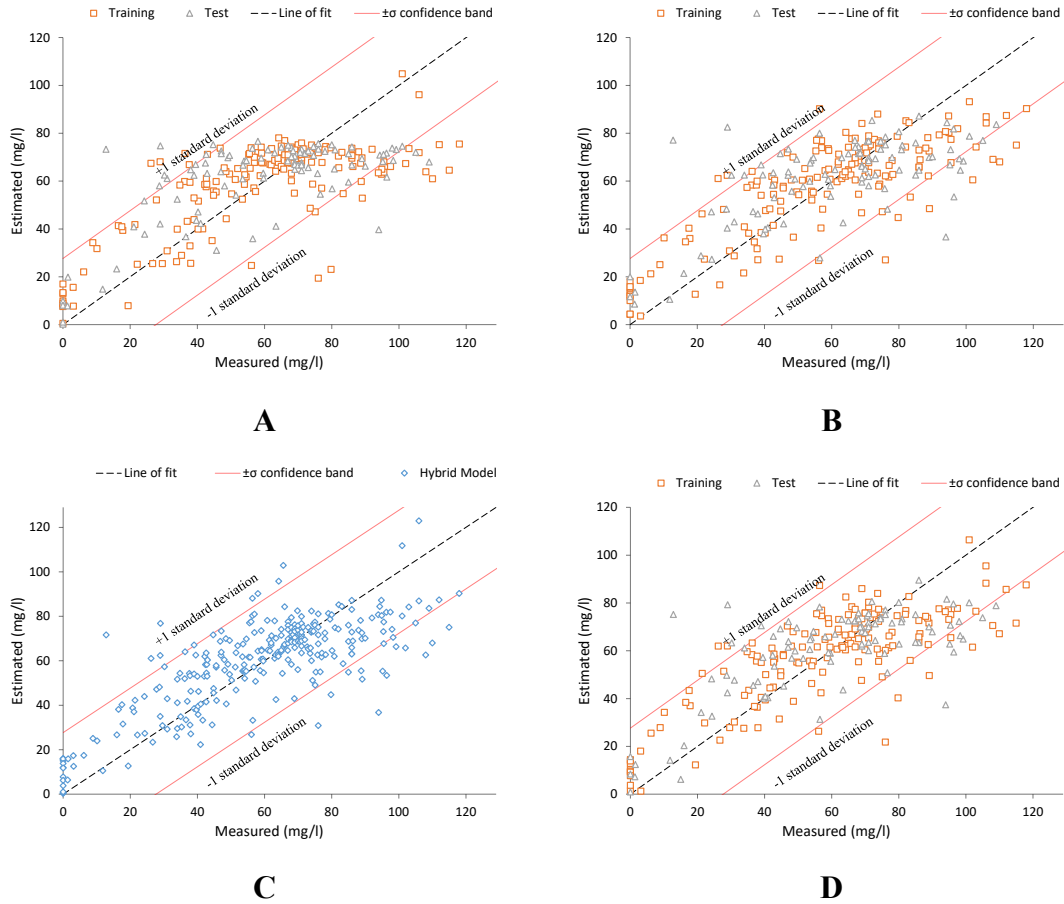

**Figure S8.** Scatter plot between laboratory measured TN values (Measured) and those estimated by: (A) Global Model, Equation (S7). (B) Individual trend model, Equation (S8). (C) Hybrid model. (D) Model based on spectral point values by Offspring Selection technique, Equation (S9).

### S1.5. Total Phosphorus estimation models (TP)

#### S1.5.1. GA model based on global trend line

The model to estimate TP from the global trend line of the spectral response, based on 304 raw water samples, after eliminating the outliers, is shown in equation (S10). The model shows a Pearson's coefficient of 54.77% for training and 61.07% for testing.

$$\begin{aligned}
 TP_{(mg/l)} &= \left( (c_0 * N_{Global})^2 * (c_1 * N_{Global} - c_2 * M_{Global}) \right) \\
 &\quad * c_6 + c_7
 \end{aligned} \tag{S10}$$

$$\begin{aligned}
 c_0 = 8.6897, c_1 = 0.2788, c_2 = -22.37, c_3 = 4.7403, c_4 = 25.167, c_5 = -26.233, \\
 c_6 = 2.5068, c_7 = 5.2719
 \end{aligned}$$

### S.1.5.2. GA model based on multiple individual trend lines for each colour group

The similar estimation levels are achieved with the model of Equation (S10), for estimating TP using the trend line of the different colour groups, with a Pearson's coefficient of 59.05% and 57.46 % for training and test, respectively.

$$TP_{(mg/l)} = \frac{(c_0 + c_1 * N_{Green}) * (c_2 - c_3 * N_{Cyan})}{(c_4 * N_{Yellow} - c_5 * N_{Blue}) - (c_6 * N_{Cyan} - c_7 * N_{Orange})} + c_8 \quad (S11)$$

$$c_0 = -12.00, c_1 = -55.31, c_2 = 14.70, c_3 = 37.56, c_4 = -7.37, c_5 = 45.13,$$

$$c_6 = 10.69, c_7 = -8.71, c_8 = 8.47$$

### S.1.5.3. GA model based on point values of the spectral response

Equation (S12) shows the model for estimating TP from point values of the spectral response, achieving a Pearson's Coefficient of 63.24% for training and 54.52% for test.

$$TP_{(mg/l)} = ((c_0 * T_{480} * T_{627} + (c_1 * T_{440} + c_2 * T_{385})) + c_6) \quad (S12)$$

$$c_0 = 25.47, c_1 = 50.94, c_2 = 88.31, c_3 = 84.46, c_4 = -63.91, c_5 = -195.47,$$

$$c_6 = 12.87$$

### S.1.5.4. Hybrid characterization model based on decision trees

Figure S9 shows the classification tree for the hybrid model of combined water characterization for TP, with an  $R^2$  for training of 65.82% and 72.73% for test, respectively.

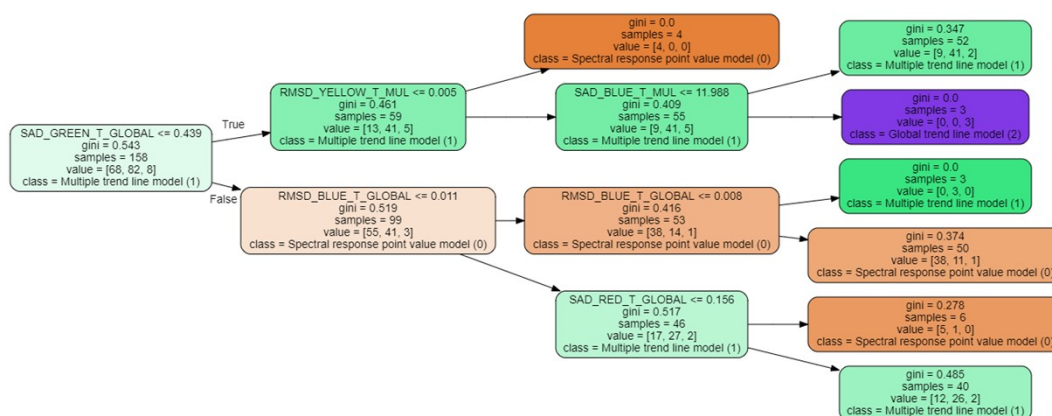

**Figure S9.** Classification tree for hybrid model of raw wastewater characterization for TP.

Figure S10 shows the scatter plot for each of the calculated models, where less dispersion is observed in the hybrid model (Figure S10 C).

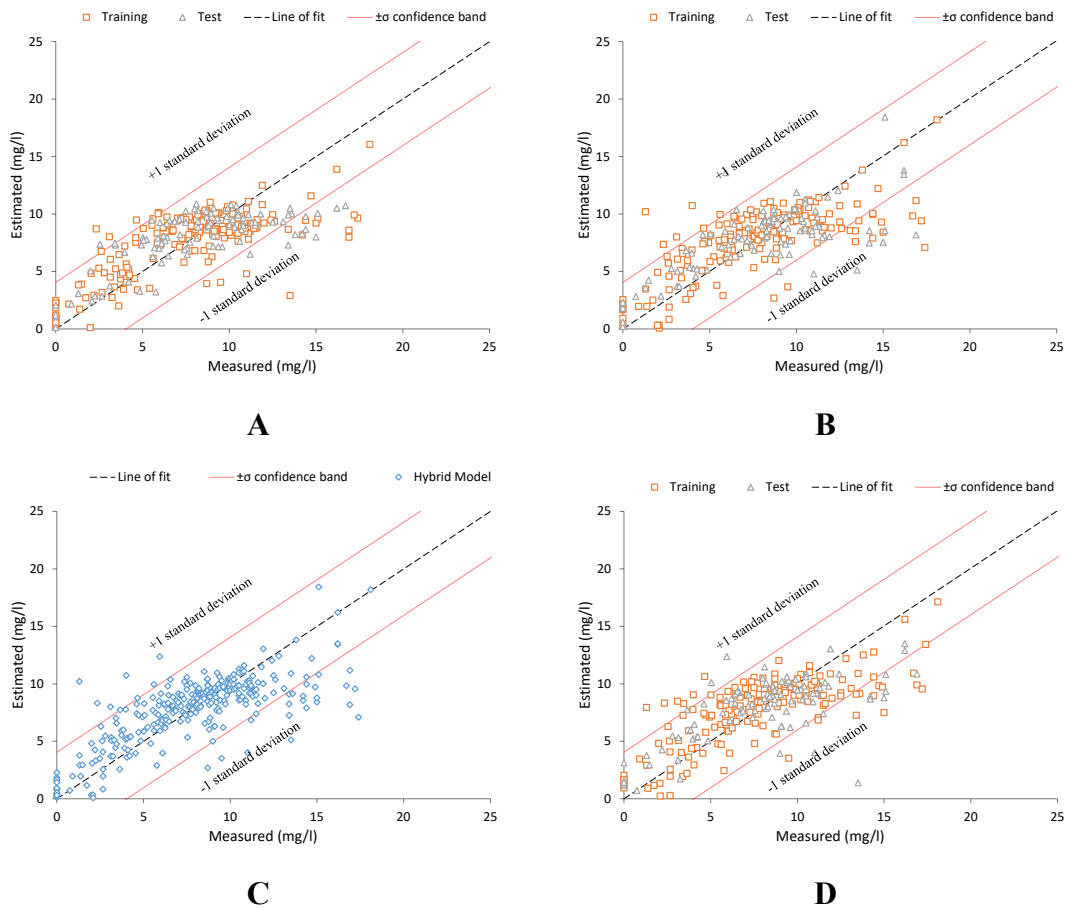

**Figure S10.** Scatter plot between laboratory measured TP values (Measured) and those estimated by: (A) Global Model, Equation (S10). (B) Individual trend model, Equation (S11). (C) Hybrid model. (D) Model based on spectral point values by Offspring Selection technique, Equation (S12).

## S2. Specific estimation models for treated wastewater

### S.2.2. Biochemical Oxygen Demand estimation models (BOD<sub>5</sub>)

#### S.2.2.1. GA model based on global trend line

Equation (S13) shows the model for estimating BOD<sub>5</sub> from the overall trend line of the spectral response, calculated from 279 treated water samples, after removing outliers. The model presents a Pearson's coefficient of 23.84% for training and 20.77% for testing.

$$BOD_{5(mg/l)} = \left( (c_0 * N_{Global})^2 - (c_1 * N_{Global} + c_2) \right) * c_3 * c_8 \quad (S13)$$

$$c_0 = -4.9436, c_1 = 25.73, c_2 = -6.8428, c_3 = 11.958, c_4 = -11.218, \\ c_5 = -14.478, c_6 = 14.461, c_7 = 63.438, c_8 = 1.8826$$

#### S.2.2.2. GA model based on multiple individual trend lines for each colour group

Similar estimation results are achieved with the model of Equation (S14), relative to the trend lines of the different colour groups of the visible spectrum, with a Pearson's coefficient of 23.13% for training and 41.74% for testing.

$$BOD_{5(mg/l)} = (c_0 * N_{Green} - c_1 * N_{Yellow}) * (c_2 * N_{Violet} - c_3 * N_{Blue}) * c_8 \quad (S14)$$

$$c_0 = 4.16, c_1 = -8.99, c_2 = 31.82, c_3 = 24.09, c_4 = -0.39, c_5 = -18.64, \\ c_6 = 3.24, c_7 = -51.89, c_8 = 3.3892$$

#### S.2.2.3. GA model based on point values of the spectral response

Equation (S15) shows the model for estimating BOD<sub>5</sub> from point values of the spectral response, achieving a Pearson's Coefficient of 45.68% for training and 26.29% for test.

$$BOD_{5(mg/l)} = \frac{(c_0 * T_{558} - c_1 * T_{555}) * \frac{c_2 * A_{586}}{A_{642}}}{(c_3 * T_{660} - c_4) + (c_5 * A_{586} - c_6 * T_{624})} + c_7 \quad (S15)$$

$$c_0 = 38.46, c_1 = 29.26, c_2 = 4.10, c_3 = 3.50, c_4 = -11.94, c_5 = -18.59, \\ c_6 = 17.06$$

$$c_7 = -3.86,$$

**S.2.2.4. Hybrid characterization model based on decision trees**

Figure S11 shows the classification tree for the hybrid characterization model for treated water for BOD<sub>5</sub>, with an R<sup>2</sup> for training of 61.27% and 66.21% for test, respectively.

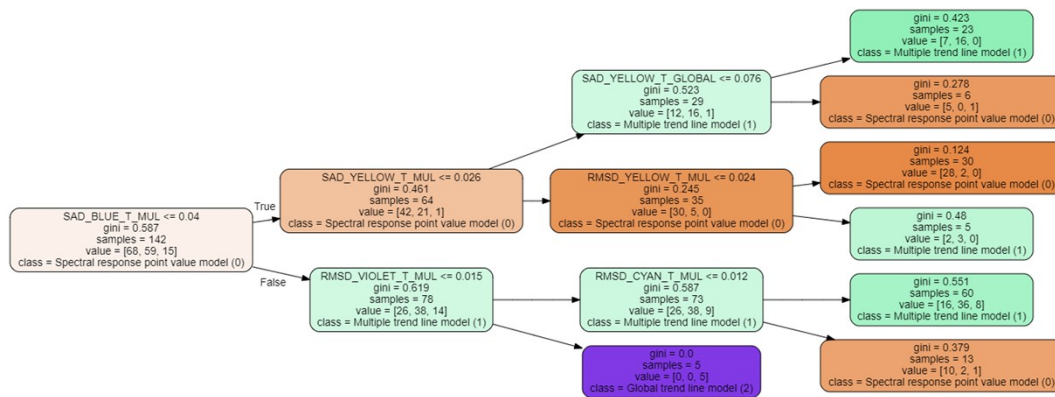

**Figure S11.** Classification tree for hybrid model of treated water characterization for BOD<sub>5</sub>.

Figure S12 shows the scatter plot of the estimation models based on trend lines (Equation (S13 and S14)), as well as the hybrid model of Figure S11. As can be seen, the scatter plot in Figure S12 C shows a lower dispersion of the data, which denotes an improvement in the ability to characterize the sample with respect to the exclusive use of other techniques.

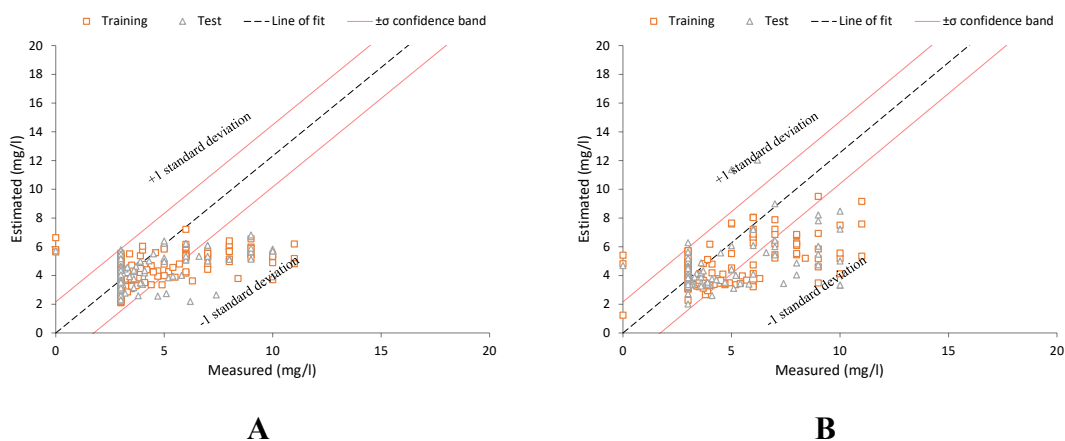

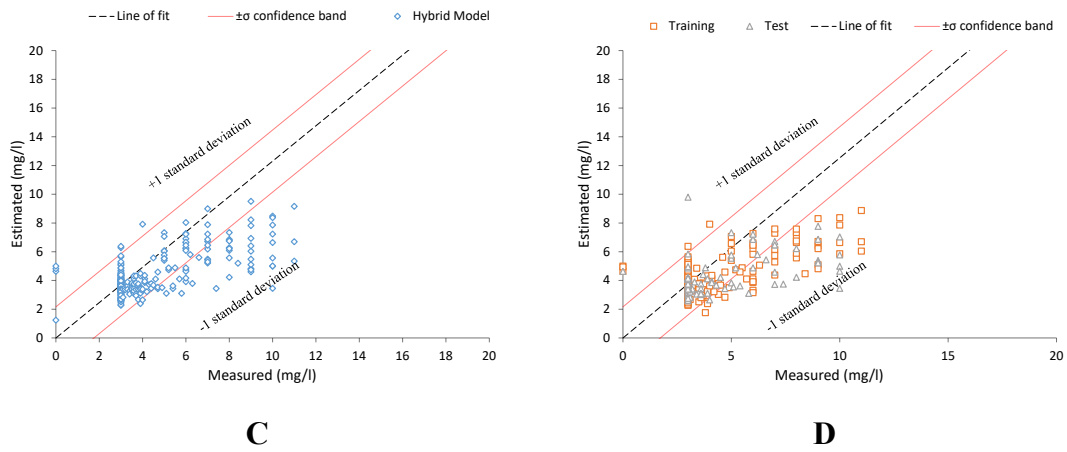

**Figure S12.** Scatter plot between laboratory measured BOD<sub>5</sub> values (Measured) and those estimated by: (A) Global Model, Equation (S13). (B) Individual trend model, Equation (S14). (C) Hybrid model. (D) Model based on spectral point values by Offspring Selection technique, Equation (S15).

### S2.3. Total Suspended Solids estimation models (TSS)

#### S.2.3.1. GA model based on global trend line

Equation (S16) shows the model for estimating the TSS from the global trend line, with a Pearson's coefficient of 28.85% for training and 29.45% for testing.

$$TSS_{(mg/l)} = (c_0 * M_{Global}^2 * c_1 * (c_2 * N_{Global} - c_3) * c_4 * c_5 \quad (S16)$$

$$c_0 = 33.118, c_1 = 33.411, c_2 = 61.383, c_3 = 33.389, c_4 = 29.123,$$

$$c_5 = -29.122, c_6 = 61.383, c_7 = 33.389, c_8 = -14.749, c_9 = 1.7179$$

#### S.2.3.2. GA model based on multiple individual trend lines for each colour group

Similar estimation levels are achieved with the model of Equation (S17), to estimate TSS from the trend line of the different colour groups, with a Pearson's coefficient of 36.04% and 27.82% for training and test, respectively.

$$TSS_{(mg/l)} = (c_0 + c_1 * N_{Violet}) * M_{Red} * N_{Blue} * \left( \frac{c_2 * N_O}{M_{Vio}} \right) \quad (S17)$$

$$c_5$$

$$c_0 = 6,496.11, c_1 = -8,459.44, c_2 = 0,81, c_3 = -66.03, c_4 = 12.86, c_5 = 5.3638$$

### S.2.3.3. GA model based on point values of the spectral response

Equation (S18) shows the model for estimating TSS from point values of the spectral response, achieving a Pearson's Coefficient of 42.42% for training and 21.73% for test.

$$TSS_{(mg/l)} = \frac{(c_0 * T_{631} - c_1 * T_{461}) * (c_2 * T_{627} + c_3)}{c_4 * A_{700}} * c_7 + c_8$$

$$\frac{(c_5 * A_{435} - c_6 * A_{410})}{(S18)}$$

$$c_0 = 4.30, c_1 = 4.41, c_2 = -16.15, c_3 = 11.16, c_4 = 1.32, c_5 = 15.07, c_6 = 14.81$$

$$c_7 = 2.31, c_8 = 2.74,$$

### S.2.3.4. Hybrid characterization model based on decision trees

Figure S13 shows the classification tree for the hybrid characterization model for treated water for TSS, with an  $R^2$  for training of 67.67% and 60% for test, respectively.

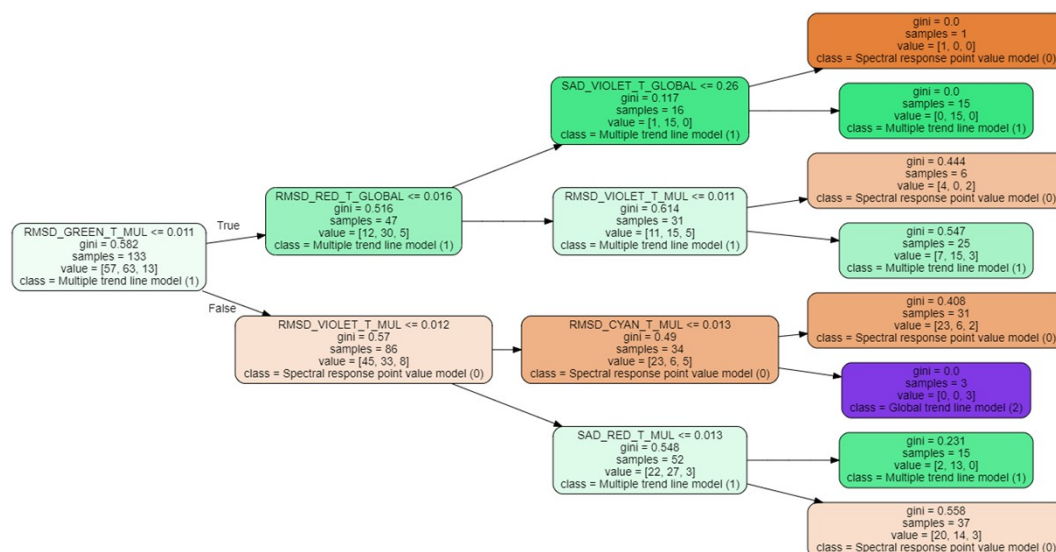

**Figure S13.** Classification tree for hybrid model of treated water characterization for TSS.

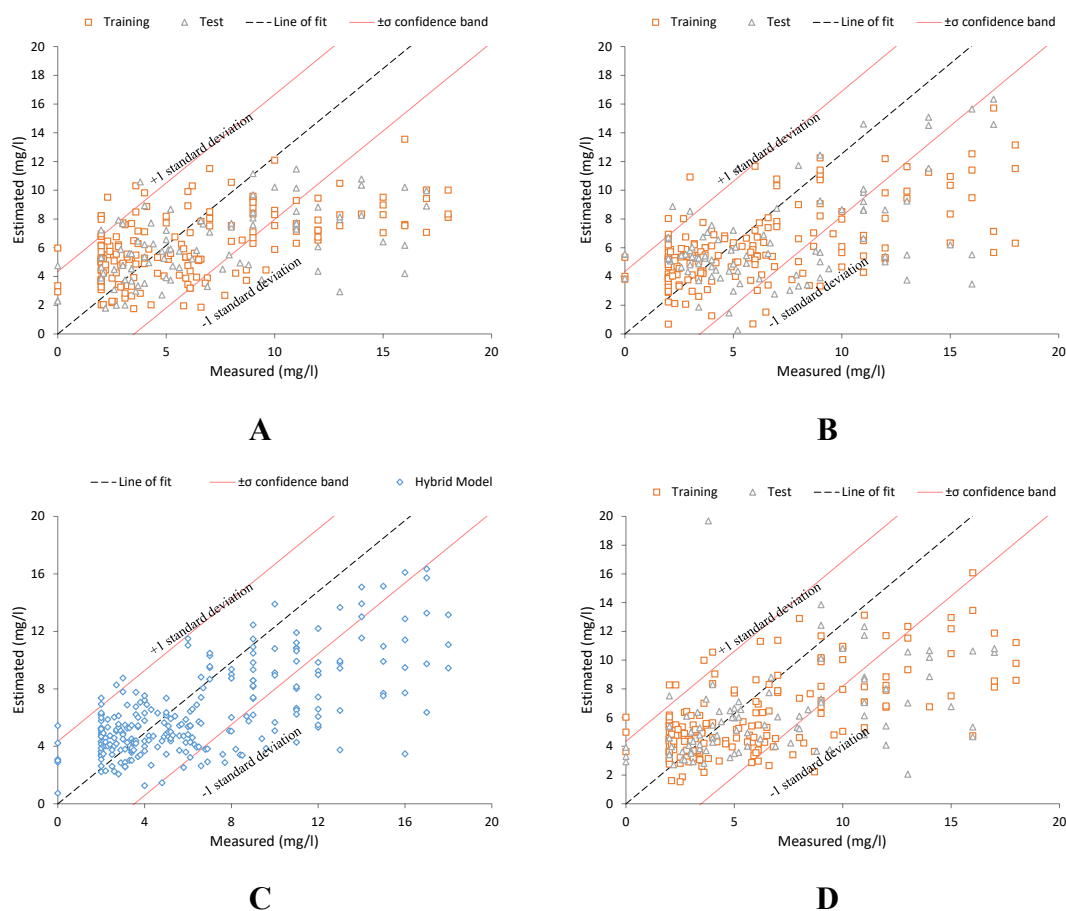

**Figure S14.** Scatter plot between laboratory measured TSS values (Measured) and those estimated by: (A) Global Model, Equation (S16). (B) Individual trend model, Equation (S17). (C) Hybrid model. (D) Model based on spectral point values by Offspring Selection technique, Equation (S18).

## S2.4. Total Nitrogen estimation models (TN)

### S2.4.1. GA model based on global trend line

Equation (S19) shows the model for estimating TN estimates from the global trend line of the spectral response, calculated from 264 treated water samples, after removing outliers. The model shows a Pearson's coefficient of 32.86% for training and 13.46% for testing.

$$TN_{(mg/l)} = (c_0 * N_{Global} - c_1) * (c_2 * N_{Global} - c_3) * c_4 * c_8 + c_9 \quad (S19)$$

$$c_0 = -52.47, c_1 = -15.796, c_2 = -47.398, c_3 = -24.975, c_4 = -18.905, \\ c_5 = -19.566, c_6 = -63.091, c_7 = 33.246, c_8 = -5.1155, c_9 = -1.0713$$

### S2.4.2. GA model based on multiple individual trend lines for each colour group



The model of Equation (S20), to estimate TN from the trend line of the different colour groups, achieves similar estimation levels, with a Pearson's coefficient of 56.98% and 31.04% for training and test, respectively.

$$TN_{(mg/l)} = \left( (c_0 * M_{Orange} - c_1 * M_{Violet}) + c_2 * M_{Red} \right) + c_7 \quad (S20)$$

$$c_0 = 136.66, c_1 = -98.15, c_2 = -388.17, c_3 = 186.51, c_4 = 201.12, c_5 = 54.93, \\ c_6 = -358.76, c_7 = 20.105$$

#### S.2.4.3. GA model based on point values of the spectral response

Equation (S21) shows the model for estimating TN from point values of the spectral response, achieving a Pearson's Coefficient of 61.65% for training and 20.06% for test.

$$TN_{(mg/l)} = \left( (c_0 * T_{660} + c_1 * A_{650}) + (c_2 * T_{615} + c_3 * \dots \right) \quad (S21)$$

$$c_0 = 26.93, c_1 = -3.16, c_2 = -34.54, c_3 = 8.97, c_4 = -27.83, c_5 = -25.43 \\ c_6 = -44.05, c_7 = 6.09, c_8 = 2.60, c_9 = 6.7$$

#### S.2.4.4. Hybrid characterization model based on decision trees

Figure S15 shows the classification tree for the hybrid characterization model for treated water for TN, with an R<sup>2</sup> of 100% both training and test.

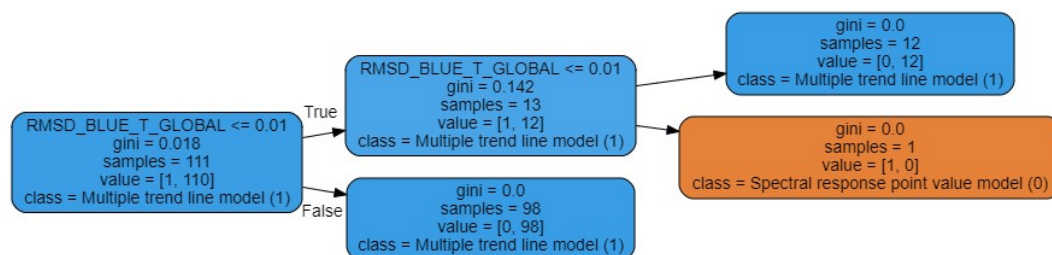

**Figure S15.** Classification tree for hybrid model of treated water characterization for TN.

Figure S16 shows the scatter plot of the estimation models based on trend lines (Equation (25 and 26)), as well as the hybrid model of Figure S15.

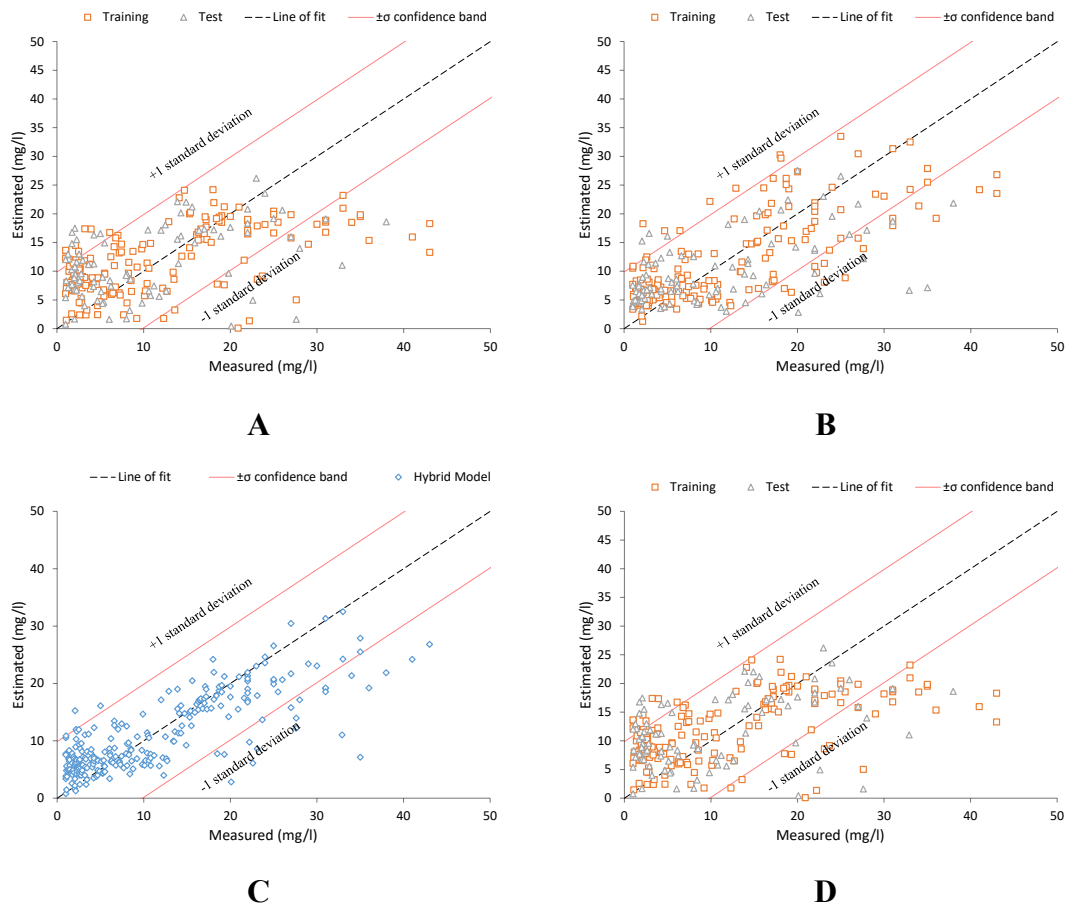

**Figure S16.** Scatter plot between laboratory measured TN values (Measured) and those estimated by: (A) Global Model, Equation (S19). (B) Individual trend model, Equation (S20). (C) Hybrid model. (D) Model based on spectral point values by Offspring Selection technique, Equation (21).

**Table S1.** Wastewater treatment plants used during the study.

| WWTP | Province                  | Population |            | Capacity (m3/a) |                | SST        |            |          | COD        |            |          | BOD <sub>5</sub> |            |          |      |
|------|---------------------------|------------|------------|-----------------|----------------|------------|------------|----------|------------|------------|----------|------------------|------------|----------|------|
|      |                           | Served     | Equivalent | In average      |                | In average |            |          | In average |            |          | In average       |            |          |      |
|      |                           |            |            | Design (m3/a)   | Current (m3/a) | In (mg/l)  | Out (mg/l) | Perf (%) | In (mg/l)  | Out (mg/l) | Perf (%) | In (mg/l)        | Out (mg/l) | Perf (%) |      |
| 1    | <b>Abanilla</b>           | Murcia     | 3.626      | 15.711          | 547.500        | 779.051    | 294        | 4        | 98.6       | 739        | 18       | 97.6             | 442        | 4        | 99.1 |
| 2    | <b>Abarán</b>             | Murcia     | 13.371     | 12.626          | 1.642.500      | 726.065    | 257        | 5        | 98.1       | 596        | 28       | 95.3             | 381        | 3        | 99.2 |
| 3    | <b>Albudeite</b>          | Murcia     | 1.296      | 1.043           | 365.000        | 45.738     | 205        | 8        | 96.1       | 756        | 31       | 95.9             | 499        | 4        | 99.2 |
| 4    | <b>Alcantarilla</b>       | Murcia     | 41.447     | 62.342          | 4.745.000      | 2.588.649  | 301        | 6        | 98.0       | 835        | 33       | 96.0             | 527        | 4        | 99.2 |
| 5    | <b>Alguazas</b>           | Murcia     | 9.102      | 37.629          | 5.475.000      | 1.076.650  | 371        | 4        | 98.9       | 1.208      | 22       | 98.2             | 765        | 3        | 99.6 |
| 6    | <b>Archena</b>            | Murcia     | 24.413     | 54.425          | 2.737.500      | 1.792.326  | 459        | 6        | 98.7       | 1.104      | 27       | 97.6             | 665        | 3        | 99.5 |
| 7    | <b>Baños y Mendigo</b>    | Murcia     | 218        | 344             | 173.375        | 21.521     | 352        | 10       | 97.2       | 591        | 36       | 93.9             | 350        | 3        | 98.9 |
| 8    | <b>Barinas</b>            | Murcia     | 756        | 1.982           | 197.100        | 73.884     | 390        | 4        | 99.0       | 906        | 21       | 97.7             | 588        | 4        | 99.3 |
| 9    | <b>Barqueros</b>          | Murcia     | 1.030      | 1.872           | 109.500        | 60.376     | 443        | 17       | 96.2       | 1.245      | 58       | 95.3             | 679        | 6        | 99.1 |
| 10   | <b>Beniel Nueva</b>       | Murcia     | 11.900     | 25.818          | 1.825.000      | 1.245.618  | 659        | 4        | 99.4       | 944        | 26       | 97.2             | 454        | 3        | 99.3 |
| 11   | <b>Blanca</b>             | Murcia     | 5.184      | 5.636           | 730.000        | 356.464    | 271        | 4        | 98.5       | 559        | 19       | 96.6             | 346        | 3        | 99.1 |
| 12   | <b>Cabezo Beaza</b>       | Murcia     | 176.223    | 173.924         | 12.775.000     | 9.031.284  | 470        | 18       | 96.2       | 924        | 52       | 94.4             | 422        | 12       | 97.2 |
| 13   | <b>Cabezo de la Plata</b> | Murcia     | 104        | 358             | 44.165         | 44.165     | 248        | 11       | 95.6       | 1.024      | 30       | 97.1             | 702        | 3        | 99.6 |
| 14   | <b>Calasparra</b>         | Murcia     | 9.505      | 26.938          | 2.190.000      | 659.778    | 408        | 3        | 99.3       | 1.426      | 23       | 98.4             | 894        | 3        | 99.7 |
| 15   | <b>Campos del Río</b>     | Murcia     | 1.998      | 1.635           | 547.500        | 88.252     | 212        | 5        | 97.6       | 649        | 21       | 96.8             | 406        | 3        | 99.3 |
| 16   | <b>Cañada de la leña</b>  | Murcia     | 93         | 28              | 21.900         | 6.166      | 68         | 19       | 72.1       | 172        | 56       | 67.4             | 99         | 6        | 93.9 |
| 17   | <b>Cañares / Bronchos</b> | Murcia     | 442        | 195             | 1.350.500      | 54.371     | 805        | 2        | 99,7       | 3.253      | 2.751    | 37.5             | 156        | 3        | 98,0 |
| 18   | <b>Casas Nuevas</b>       | Murcia     | 152        | 220             | 73.000         | 8.170      | 847        | 6        | 99.3       | 1.190      | 28       | 97.6             | 590        | 4        | 99.3 |
| 19   | <b>Ceutí Nueva</b>        | Murcia     | 11.774     | 36.311          | 2.920.000      | 1.052.685  | 448        | 11       | 97.5       | 1.274      | 33       | 97.4             | 755        | 3        | 99.6 |
| 20   | <b>Cieza</b>              | Murcia     | 33.797     | 63.567          | 3.650.000      | 2.485.914  | 362        | 5        | 98.6       | 872        | 23       | 97.4             | 560        | 3        | 99.5 |

|    |                              |        |         |         |            |            |     |    |      |       |    |      |     |    |      |
|----|------------------------------|--------|---------|---------|------------|------------|-----|----|------|-------|----|------|-----|----|------|
| 21 | <b>Corvera</b>               | Murcia | 2.443   | 2.464   | 109.500    | 133.534    | 284 | 2  | 99.3 | 682   | 24 | 96.5 | 404 | 3  | 99.3 |
| 22 | <b>El Cantón</b>             | Murcia | 66      | 506     | 18.250     | 18.250     | 324 | 18 | 94.4 | 1.058 | 34 | 96.8 | 608 | 5  | 99.2 |
| 23 | <b>El Raal</b>               | Murcia | 15.940  | 23.706  | 2.737.500  | 3.950.557  | 151 | 7  | 95.4 | 240   | 21 | 91.3 | 131 | 4  | 96.9 |
| 24 | <b>El Valle</b>              | Murcia | 194     | 464     | 511.000    | 58.089     | 378 | 5  | 98.7 | 343   | 17 | 95.0 | 175 | 3  | 98.3 |
| 25 | <b>Fortuna</b>               | Murcia | 7.557   | 11.544  | 912.500    | 423.126    | 445 | 9  | 98.0 | 975   | 34 | 96.5 | 598 | 4  | 99.3 |
| 26 | <b>Fuente Librilla</b>       | Murcia | 579     | 1.418   | 146.000    | 44.776     | 266 | 19 | 92.9 | 1.122 | 38 | 96.6 | 694 | 4  | 99.4 |
| 27 | <b>Hacienda Riquelme</b>     | Murcia | 224     | 658     | 574.875    | 64.366     | 145 | 5  | 96.6 | 313   | 24 | 92.3 | 159 | 3  | 98.1 |
| 28 | <b>Jumilla Nueva</b>         | Murcia | 24.588  | 70.595  | 4.380.000  | 1.739.564  | 825 | 3  | 99.6 | 1.761 | 24 | 98.6 | 889 | 3  | 99.7 |
| 29 | <b>La Murta</b>              | Murcia | 91      | 545     | 44.165     | 15.378     | 353 | 4  | 98.9 | 1.271 | 28 | 97.8 | 776 | 3  | 99.6 |
| 30 | <b>Lorqui</b>                | Murcia | 6.622   | 26.108  | 1.825.000  | 1.221.497  | 376 | 4  | 98.9 | 835   | 19 | 97.7 | 468 | 3  | 99.4 |
| 31 | <b>Macisvenda</b>            | Murcia | 504     | 557     | 41.975     | 26.219     | 242 | 5  | 97.9 | 730   | 30 | 95.9 | 465 | 3  | 99.4 |
| 32 | <b>Molina Norte</b>          | Murcia | 68.296  | 218.823 | 9.125.000  | 6.093.740  | 490 | 6  | 98.8 | 1.456 | 36 | 97.5 | 786 | 3  | 99.6 |
| 33 | <b>Mosa Trajectum</b>        | Murcia | 144     | 285     | 642.400    | 42.568     | 177 | 3  | 98.3 | 270   | 15 | 94.4 | 147 | 3  | 98.0 |
| 34 | <b>Mula Nueva</b>            | Murcia | 15.496  | 17.210  | 2.190.000  | 672.031    | 335 | 2  | 99.4 | 892   | 18 | 98.0 | 561 | 3  | 99.5 |
| 35 | <b>Murcia Este</b>           | Murcia | 375.775 | 553.451 | 36.500.000 | 36.952.999 | 277 | 9  | 96.8 | 577   | 32 | 94.5 | 328 | 5  | 98.5 |
| 36 | <b>Pliego</b>                | Murcia | 3.631   | 4.490   | 547.500    | 162.769    | 583 | 3  | 99.5 | 1.150 | 23 | 98.0 | 604 | 3  | 99.5 |
| 37 | <b>Pol. Ind. Fortuna</b>     | Murcia | 0       | 584     | 65.700     | 22.945     | 797 | 30 | 96.2 | 855   | 68 | 92.0 | 557 | 13 | 97.7 |
| 38 | <b>Santomera Norte</b>       | Murcia | 14.956  | 16.139  | 2.190.000  | 1.137.404  | 242 | 5  | 97.9 | 526   | 33 | 93.7 | 311 | 4  | 98.7 |
| 39 | <b>Sucina Nueva</b>          | Murcia | 1.924   | 3.634   | 1.825.000  | 173.650    | 212 | 3  | 98.6 | 681   | 22 | 96.8 | 458 | 3  | 99.3 |
| 40 | <b>Torres de Cotillas N.</b> | Murcia | 19.996  | 53.597  | 4.380.000  | 1.602.051  | 641 | 9  | 98.6 | 1.281 | 21 | 98.4 | 733 | 3  | 99.6 |
| 41 | <b>El Trampolín</b>          | Murcia | 149     | 158     | 73.000     | 13.930     | 329 | 37 | 88.8 | 396   | 33 | 91.7 | 248 | 4  | 98.4 |
| 42 | <b>Yecla</b>                 | Murcia | 31.876  | 43.586  | 2.920.000  | 1.648.354  | 490 | 7  | 98.6 | 1.015 | 20 | 98.0 | 579 | 3  | 99.5 |
| 43 | <b>Yecla Raspay</b>          | Murcia | 97      | 109     | 18.250     | 8.385      | 147 | 5  | 96.6 | 477   | 18 | 96.2 | 286 | 4  | 98.6 |

**Table S2.** Example of optimal model selection for treated water samples from the decision tree in Figure 5.

| Ref | G.T.M* | M.T.M** | S.P.M*** | Best model | RMSD_VIOLET_T | RMSD_BLUE_T | RMSD_CYAN_T | RMSD_GREEN_T | RMSD_YELLOW_T | RMSD_ORANGE_T | RMSD_RED_T | RMSD_VIOLET_T | RMSD_BLUE_T | RMSD_CYAN_T | RMSD_GREEN_T | RMSD_YELLOW_T | RMSD_ORANGE_T | RMSD_RED_T | Tree's model | Tree's best estimation |
|-----|--------|---------|----------|------------|---------------|-------------|-------------|--------------|---------------|---------------|------------|---------------|-------------|-------------|--------------|---------------|---------------|------------|--------------|------------------------|
|     |        |         |          |            | GLOBAL        | GLOBAL      | GLOBAL      | GLOBAL       | GLOBAL        | GLOBAL        | GLOBAL     | MUL           | MUL         | MUL         | MUL          | MUL           | MUL           | MUL        |              |                        |
| 20  | 19.43  | 16.98   | 33.07    | G.T.M      | 0.041         | 0.013       | 0.029       | 0.029        | 0.009         | 0.017         | 0.037      | 0.012         | 0.006       | 0.012       | 0.011        | 0.011         | 0.015         | 0.037      | G.T.M        | 19.43                  |
| 31  | 21.71  | 18.15   | 30.41    | S.P.M      | 0.037         | 0.011       | 0.029       | 0.035        | 0.024         | 0.021         | 0.038      | 0.012         | 0.005       | 0.011       | 0.016        | 0.024         | 0.018         | 0.036      | M.T.M        | 18.15                  |
| 17  | 18.27  | 18.06   | 27.90    | M.T.M      | 0.039         | 0.011       | 0.029       | 0.034        | 0.019         | 0.020         | 0.038      | 0.011         | 0.004       | 0.010       | 0.014        | 0.021         | 0.018         | 0.037      | M.T.M        | 18.06                  |
| 10  | 11.68  | 15.03   | 10.84    | S.P.M      | 0.031         | 0.010       | 0.035       | 0.037        | 0.051         | 0.035         | 0.028      | 0.015         | 0.004       | 0.013       | 0.018        | 0.037         | 0.030         | 0.024      | S.P.M        | 10.84                  |
| 10  | 13.50  | 14,71   | 11.03    | S.P.M      | 0.035         | 0.012       | 0.038       | 0.039        | 0.049         | 0.036         | 0.032      | 0.015         | 0.005       | 0.012       | 0.017        | 0.037         | 0.031         | 0.029      | S.P.M        | 11.03                  |
| 30  | 24.09  | 23,87   | 26.03    | S.P.M      | 0.039         | 0.010       | 0.029       | 0.024        | 0.015         | 0.013         | 0.021      | 0.013         | 0.005       | 0.012       | 0.012        | 0.006         | 0.012         | 0.016      | S.P.M        | 26.03                  |
| 23  | 16.95  | 20.38   | 18.28    | M.T.M      | 0.040         | 0.014       | 0.034       | 0.038        | 0.034         | 0.026         | 0.041      | 0.012         | 0.006       | 0.011       | 0.016        | 0.032         | 0.023         | 0.038      | M.T.M        | 20.38                  |
| 23  | 17.79  | 15.67   | 34.69    | G.T.M      | 0.042         | 0.010       | 0.032       | 0.035        | 0.020         | 0.021         | 0.040      | 0.013         | 0.004       | 0.014       | 0.013        | 0.022         | 0.018         | 0.038      | M.T.M        | 15.67                  |
| 24  | 21.52  | 16.31   | 28.97    | Any        | 0.041         | 0.013       | 0.030       | 0.032        | 0.018         | 0.019         | 0.037      | 0.012         | 0.004       | 0.011       | 0.013        | 0.019         | 0.016         | 0.035      | Any          | 28.97                  |
| 10  | 15.23  | 14.04   | 20.11    | M.T.M      | 0.034         | 0.010       | 0.026       | 0.031        | 0.033         | 0.024         | 0.040      | 0.011         | 0.003       | 0.010       | 0.014        | 0.024         | 0.021         | 0.038      | M.T.M        | 14.04                  |
| 10  | 16.39  | 13.42   | 23.67    | M.T.M      | 0.038         | 0.010       | 0.027       | 0.032        | 0.024         | 0.021         | 0.038      | 0.013         | 0.004       | 0.011       | 0.014        | 0.020         | 0.016         | 0.036      | M.T.M        | 13.42                  |
| 10  | 13.78  | 13.40   | 19.54    | M.T.M      | 0.035         | 0.008       | 0.026       | 0.033        | 0.031         | 0.024         | 0.041      | 0.012         | 0.003       | 0.011       | 0.015        | 0.024         | 0.021         | 0.039      | M.T.M        | 13.40                  |
| 10  | 16.31  | 15.90   | 28.06    | M.T.M      | 0.035         | 0.010       | 0.022       | 0.027        | 0.012         | 0.019         | 0.041      | 0.012         | 0.004       | 0.010       | 0.013        | 0.011         | 0.016         | 0.039      | M.T.M        | 15.90                  |
| 20  | 22.08  | 18.12   | 18.80    | S.P.M      | 0.043         | 0.013       | 0.028       | 0.029        | 0.010         | 0.017         | 0.036      | 0.015         | 0.004       | 0.010       | 0.013        | 0.011         | 0.015         | 0.034      | M.T.M        | 18.12                  |
| 10  | 18.06  | 15.69   | 20.37    | M.T.M      | 0.035         | 0.011       | 0.027       | 0.035        | 0.034         | 0.025         | 0.039      | 0.011         | 0.004       | 0.011       | 0.016        | 0.029         | 0.022         | 0.037      | M.T.M        | 15.69                  |
| 11  | 17.23  | 11.48   | 24.60    | M.T.M      | 0.043         | 0.012       | 0.030       | 0.036        | 0.029         | 0.024         | 0.041      | 0.014         | 0.005       | 0.013       | 0.015        | 0.025         | 0.020         | 0.039      | M.T.M        | 11.48                  |
| 0   | 17.61  | 13.88   | 22.47    | M.T.M      | 0.039         | 0.013       | 0.028       | 0.034        | 0.028         | 0.024         | 0.040      | 0.013         | 0.005       | 0.011       | 0.014        | 0.024         | 0.020         | 0.038      | M.T.M        | 13.88                  |
| 13  | 20.81  | 13.40   | -1.52    | M.T.M      | 0.038         | 0.011       | 0.024       | 0.035        | 0.020         | 0.023         | 0.038      | 0.014         | 0.006       | 0.011       | 0.014        | 0.023         | 0.021         | 0.037      | M.T.M        | 13.40                  |
| 13  | 15.33  | 10.43   | 20.52    | Any        | 0.041         | 0.016       | 0.037       | 0.040        | 0.045         | 0.034         | 0.045      | 0.013         | 0.007       | 0.013       | 0.017        | 0.033         | 0.028         | 0.042      | Any          | 20.52                  |
| 14  | 14.04  | 14.26   | 16.54    | Any        | 0.032         | 0.010       | 0.025       | 0.034        | 0.039         | 0.026         | 0.041      | 0.012         | 0.006       | 0.011       | 0.016        | 0.029         | 0.023         | 0.038      | Any          | 16.54                  |

\*G.T.M: Global trend line model \*\*M.T.M: Multiple trend line model \*\*\* S.P.M: Spectral point value model

Table S2 in Supplementary Information shows an example application of the hybrid characterization model based on the decision tree shown in Figure 7 for 20 treated wastewater samples taken at random, where the reference values measured in the laboratory are indicated, as well as the estimates made by each of the models, and the RSMD of each colour group that will be used to determine which model is more appropriate to apply.

This table shows which estimation model is the most adequate ('Best model') according to the relation between the reference value and those provided by the different estimation models, as well as which is the model proposed by the tree in Figure 7 based on the RSMD values shown in Table S2. As can be seen, the classification performed by the tree match in most cases with the best possible model (marked in green), allowing to achieve better estimates.

Likewise, in those models, whose estimates are similar to each other (but not necessarily to the reference value), they have been designated with the label 'Any' to indicate that any of the models can be equally valid, i.e., all models are equally good/bad at characterizing the sample

**Table S3:** Performance analysis of the models presented for different levels of random perturbation in terms of RMSE.

| Parameter        | Type of wastewater | Perturbation | RMSE           |                             |                            |              |
|------------------|--------------------|--------------|----------------|-----------------------------|----------------------------|--------------|
|                  |                    |              | Punctual model | Global straight trend model | Multiple trend lines model | Hybrid model |
| COD              |                    | 0%           | 194.03         | 212.91                      | 205.63                     | 187.59       |
|                  |                    | 2%           | 235.50         | 212.70                      | 231.27                     | 186.63       |
|                  |                    | 5%           | 406.94         | 214.93                      | 294.90                     | 201.75       |
|                  |                    | 10%          | 1371.01        | 219.37                      | 464.09                     | 210.59       |
|                  |                    | 15%          | 2753.27        | 222.38                      | 659.93                     | 238.45       |
|                  |                    | 20%          | 4250.74        | 360.44                      | 895.74                     | 353.55       |
| BOD <sub>5</sub> | Raw                | 0%           | 148.00         | 154.67                      | 150.54                     | 143.36       |
|                  |                    | 2%           | 342.08         | 154.95                      | 193.96                     | 144.80       |
|                  |                    | 5%           | 1242.98        | 155.05                      | 1331.52                    | 150.60       |
|                  |                    | 10%          | 927.05         | 157.62                      | 1864.17                    | 146.07       |
|                  |                    | 15%          | 1178.66        | 155.10                      | 1864.39                    | 185.03       |
|                  |                    | 20%          | 934.26         | 165.75                      | 1404.90                    | 174.69       |
| TSS              |                    | 0%           | 79.22          | 88.39                       | 83.17                      | 75.73        |
|                  |                    | 2%           | 128.73         | 88.51                       | 88.53                      | 82.78        |
|                  |                    | 5%           | 292.30         | 89.41                       | 112.22                     | 83.47        |
|                  |                    | 10%          | 1292.38        | 89.54                       | 226.21                     | 93.95        |
|                  |                    | 15%          | 1548.40        | 92.52                       | 473.32                     | 139.07       |
|                  |                    | 20%          | 1934.73        | 97.31                       | 800.57                     | 196.26       |

|                  |         |     |        |       |        |       |
|------------------|---------|-----|--------|-------|--------|-------|
| TN               |         | 0%  | 16.63  | 18.01 | 16.89  | 16.48 |
|                  |         | 2%  | 37.61  | 18.00 | 34.17  | 16.50 |
|                  |         | 5%  | 98.71  | 18.00 | 116.12 | 17.08 |
|                  |         | 10% | 176.35 | 18.70 | 298.13 | 18.39 |
|                  |         | 15% | 323.57 | 18.16 | 434.46 | 26.10 |
|                  |         | 20% | 403.79 | 71.53 | 524.02 | 60.54 |
| TP               |         | 0%  | 2.56   | 2.66  | 2.61   | 2.49  |
|                  |         | 2%  | 4.05   | 2.66  | 4.77   | 2.60  |
|                  |         | 5%  | 7.83   | 2.65  | 23.92  | 2.68  |
|                  |         | 10% | 14.66  | 2.76  | 43.18  | 2.75  |
|                  |         | 15% | 22.70  | 2.86  | 60.90  | 3.72  |
|                  |         | 20% | 29.41  | 3.06  | 55.32  | 4.15  |
| COD              |         | 0%  | 10.66  | 12.74 | 10.75  | 10.30 |
|                  |         | 2%  | 12.28  | 12.51 | 15.36  | 10.33 |
|                  |         | 5%  | 18.25  | 13.89 | 59.55  | 13.42 |
|                  |         | 10% | 77.87  | 17.34 | 99.47  | 17.35 |
|                  |         | 15% | 186.27 | 22.42 | 104.61 | 19.96 |
|                  |         | 20% | 206.98 | 24.11 | 132.15 | 21.55 |
| BOD <sub>5</sub> | Treated | 0%  | 1.70   | 1.90  | 1.78   | 1.56  |
|                  |         | 2%  | 2.97   | 1.90  | 4.52   | 1.83  |
|                  |         | 5%  | 26.47  | 1.93  | 6.44   | 1.91  |
|                  |         | 10% | 30.43  | 2.02  | 25.39  | 1.98  |
|                  |         | 15% | 34.66  | 2.12  | 46.98  | 2.42  |
|                  |         | 20% | 32.97  | 2.37  | 63.16  | 3.25  |
| TSS              |         | 0%  | 3.54   | 3.66  | 3.59   | 3.16  |
|                  |         | 2%  | 4.61   | 3.67  | 4.80   | 3.55  |
|                  |         | 5%  | 15.55  | 3.75  | 25.87  | 3.78  |
|                  |         | 10% | 49.61  | 4.19  | 48.42  | 3.83  |
|                  |         | 15% | 70.94  | 4.81  | 59.33  | 7.82  |
|                  |         | 20% | 83.81  | 6.29  | 71.58  | 12.57 |
| TN               |         | 0%  | 7.70   | 8.56  | 7.04   | 5.86  |
|                  |         | 2%  | 10.12  | 8.50  | 8.23   | 7.18  |
|                  |         | 5%  | 20.66  | 8.62  | 13.75  | 7.99  |
|                  |         | 10% | 57.15  | 9.78  | 34.95  | 9.91  |
|                  |         | 15% | 120.64 | 10.17 | 75.51  | 17.88 |
|                  |         | 20% | 167.30 | 11.57 | 113.47 | 34.86 |
